# Supplementary material for: Gender-Related Differences in Trimethylamine and Oxidative Blood Biomarkers in Cardiovascular Disease Patients
Source: MDPI journal article supplement (doi:10.3390/biomedicines8080238), 2020-07-23
Supplement: s1 [file s1]

**Table S1.** Plasma TMAO level in Male and Female from Control and CVD groups

| Gender   | Control       | CVD         |
|----------|---------------|-------------|
| Male     | 7.82 ± 5.21   | 8.48 ± 7.23 |
| Female   | 11.91 ± 11.62 | 9.51 ± 7.70 |
| P > 0.05 |               |             |
